# Supplementary material for: Synthesis and self-assembly of hyperbranched multiarm copolymer peptide conjugates based on light-induced metal-free ATRP
Source: Royal Society of Chemistry journal article supplement (doi:10.1039/d3py00504f), 2023-01-01
Supplement: d3py00504f1.pdf [file d3py00504f1.pdf]

## Supporting Information

# Synthesis and self-assembly of hyperbranched multiarm copolymer peptide conjugates based on light-induced metal-free ATRP

Yue Zhang\*, Rong Zhao, Yan Qin, Jianguo Yi, Jimin Zhang\* and Xiaoi  
Chen

**Characterization:**  $^1\text{H}$  NMR measurements were carried out on a 400 MHz Varian UNITY-plus NMR spectrometer. The  $M_n$  and the dispersity were measured by a Hitachi gel permeation chromatography (GPC) with DMF as the mobile phase and PMMA as the standards. The GPC was equipped with a Hitachi L-2490 refractive index detector and a Viscotek 270 dual detector. Scanning electron microscopy (SEM) was measured with an FEI Apreo S LoVac electron microscope. Transmission electron microscopy (TEM) was measured with a Tecnai G2 F20 electron microscope under 200 kV operating voltage. The hydrodynamic diameters ( $D_h$ ), the polydispersities (PDI) and the Zeta potentials of the assemblies were measured by a Malvern Zetasizer Nano-ZS. The UV-vis absorbance spectra were collected on a Shimadzu UV-2450 spectrophotometer. Confocal images of the aggregates were obtained with a ZEISS LSM800 CLSM.

**Table S1.** Polymerization recipe of the hyperbranched polymers

|              | DEGMA (mL) | BMA (g) | PTH (mg) | DMF (mL) | Time (h) |
|--------------|------------|---------|----------|----------|----------|
| $h_1$ PDEGMA | 2.70       | 0.4     | 4.4      | 3.1      | 11       |
| $h_2$ PDEGMA | 2.15       | 0.4     | 3.6      | 2.5      | 13       |
| $h_3$ PDEGMA | 1.35       | 0.4     | 2.4      | 1.7      | 12       |

**Table S2.** Polymerization recipe of the hyperbranched multiarm copolymers

|                                  | hPDEGMA (g) | DSMA (g) | PTH (mg) | DMF (mL) |
|----------------------------------|-------------|----------|----------|----------|
| $h_1$ PDEGMA- <i>star</i> -PDSMA | 0.15        | 0.233    | 1.3      | 1.5      |
| $h_2$ PDEGMA- <i>star</i> -PDSMA | 0.15        | 0.328    | 1.7      | 1.5      |
| $h_3$ PDEGMA- <i>star</i> -PDSMA | 0.15        | 0.179    | 1.0      | 1.5      |

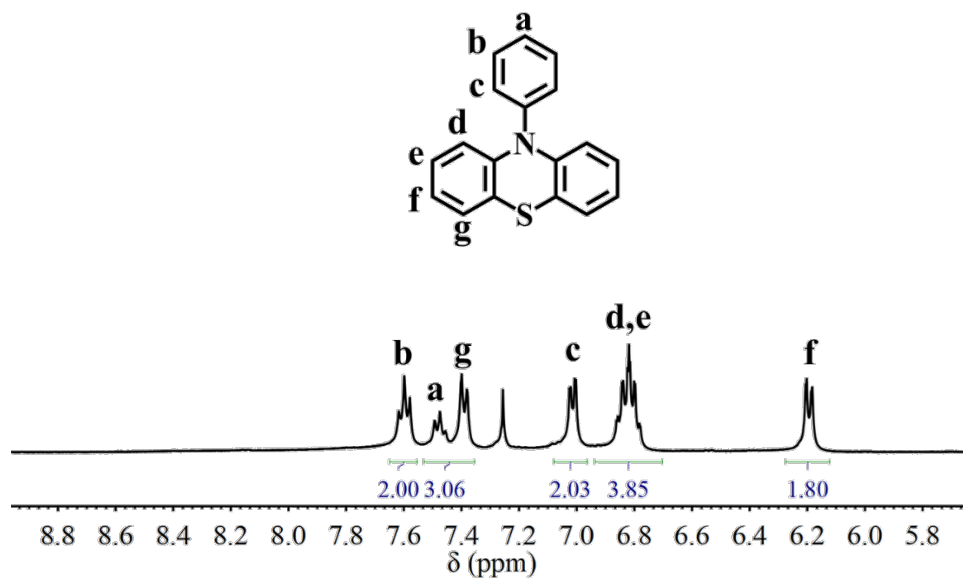

Figure S1.  $^1\text{H NMR}$  spectrum of PTH in  $\text{CDCl}_3$ .

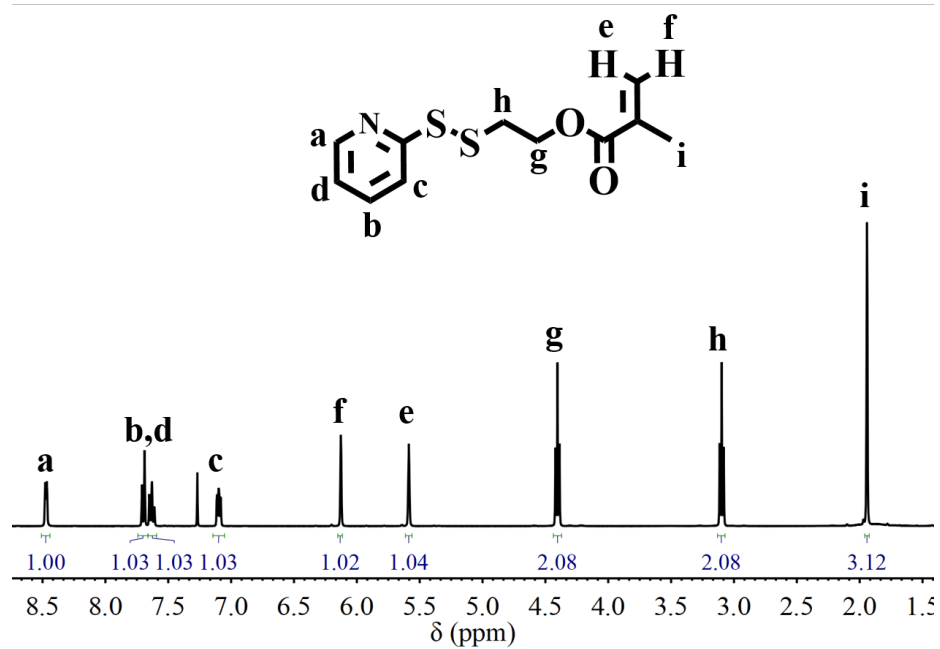

Figure S2.  $^1\text{H NMR}$  spectrum of DSMA in  $\text{CDCl}_3$ .

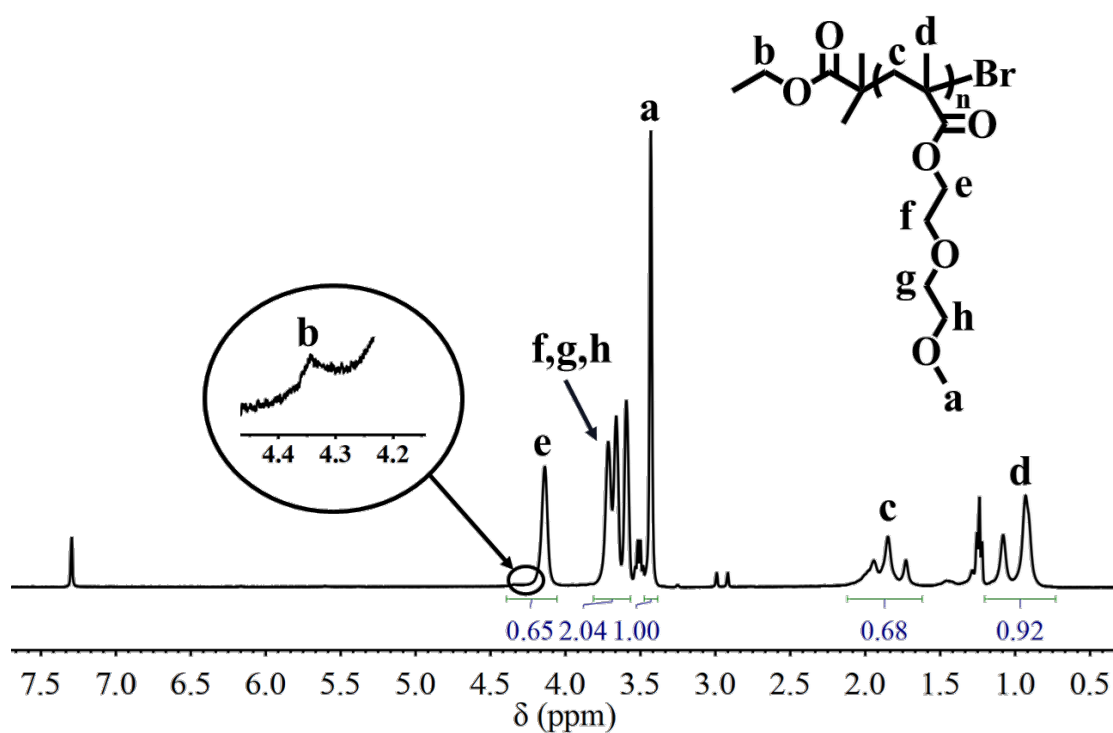

Figure S3. <sup>1</sup>H NMR spectrum of PDEGMA in CDCl<sub>3</sub>.

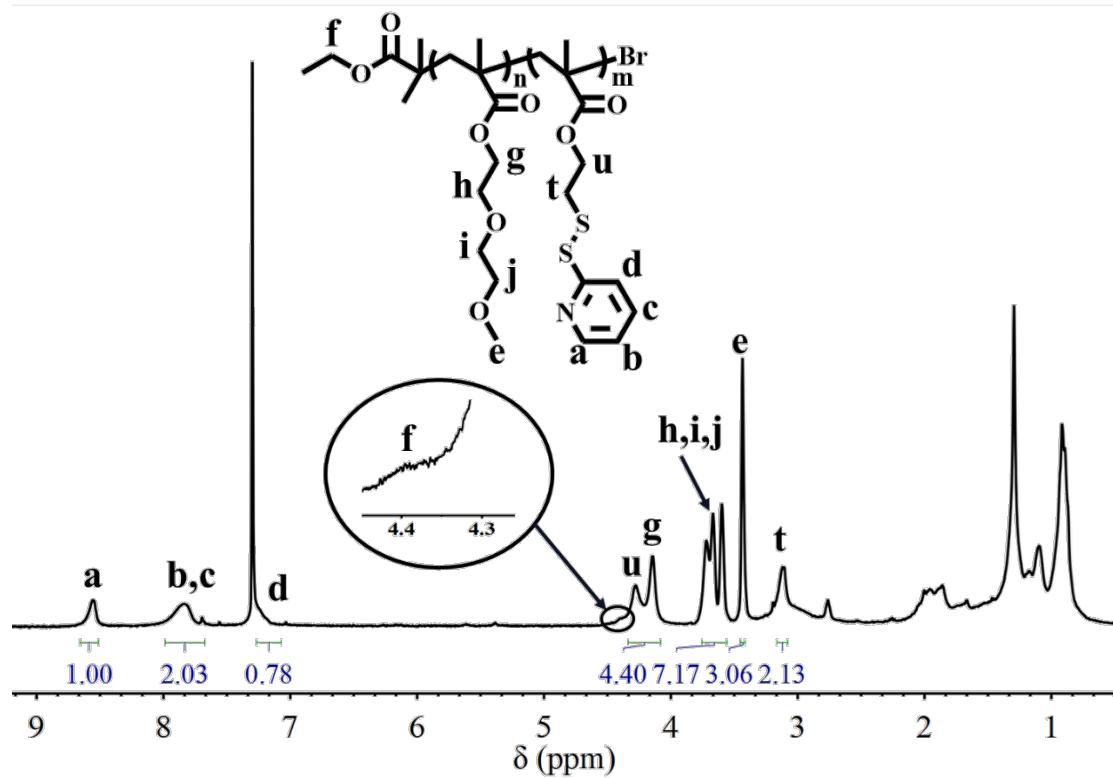

Figure S4. <sup>1</sup>H NMR spectrum of PDEGMA-*b*-PDSMA in CDCl<sub>3</sub>.

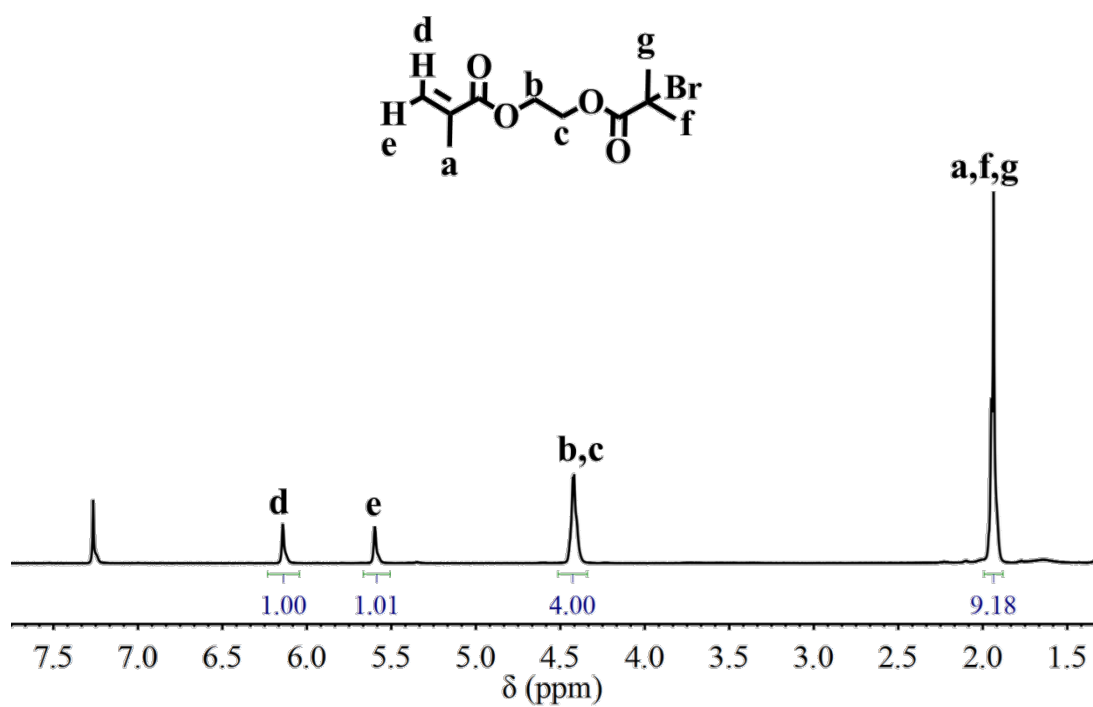

Figure S5. <sup>1</sup>H NMR spectrum of BMA in CDCl<sub>3</sub>.

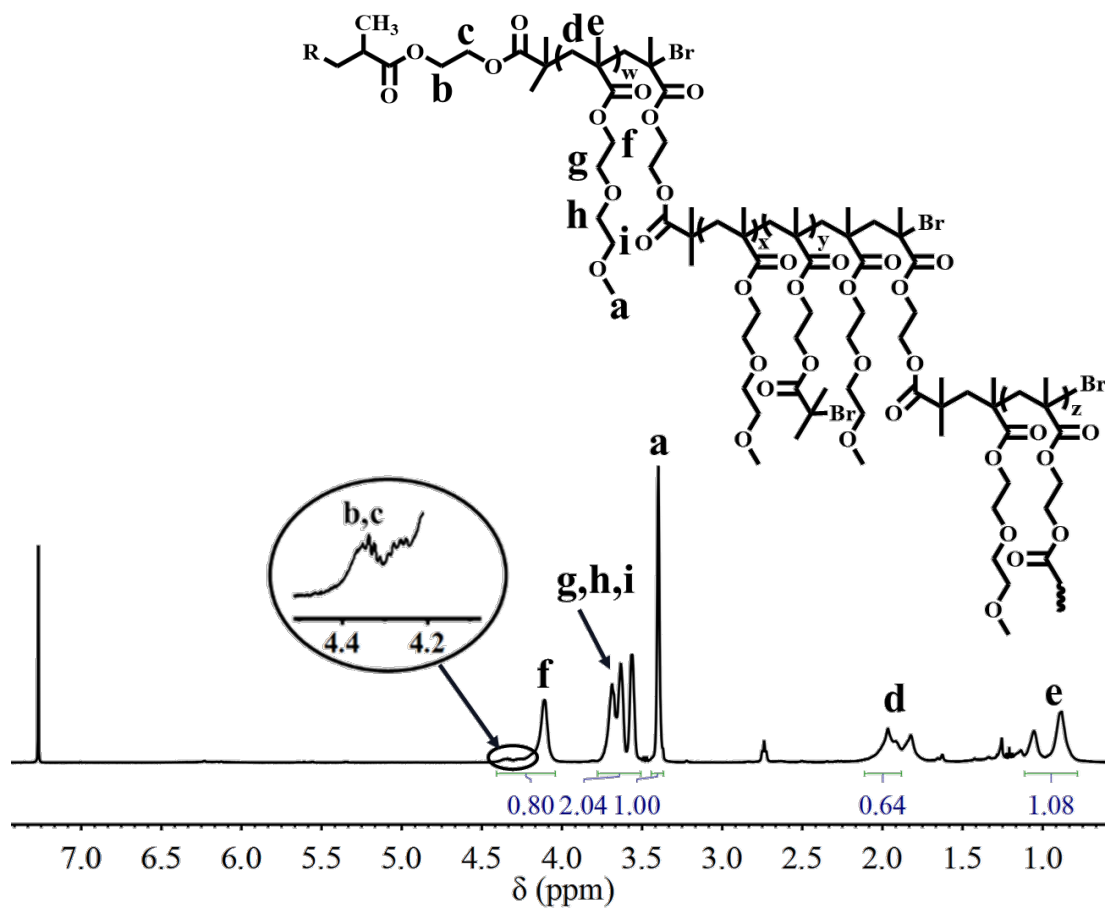

Figure S6. <sup>1</sup>H NMR spectrum of h<sub>1</sub>PDEGMA in CDCl<sub>3</sub>.

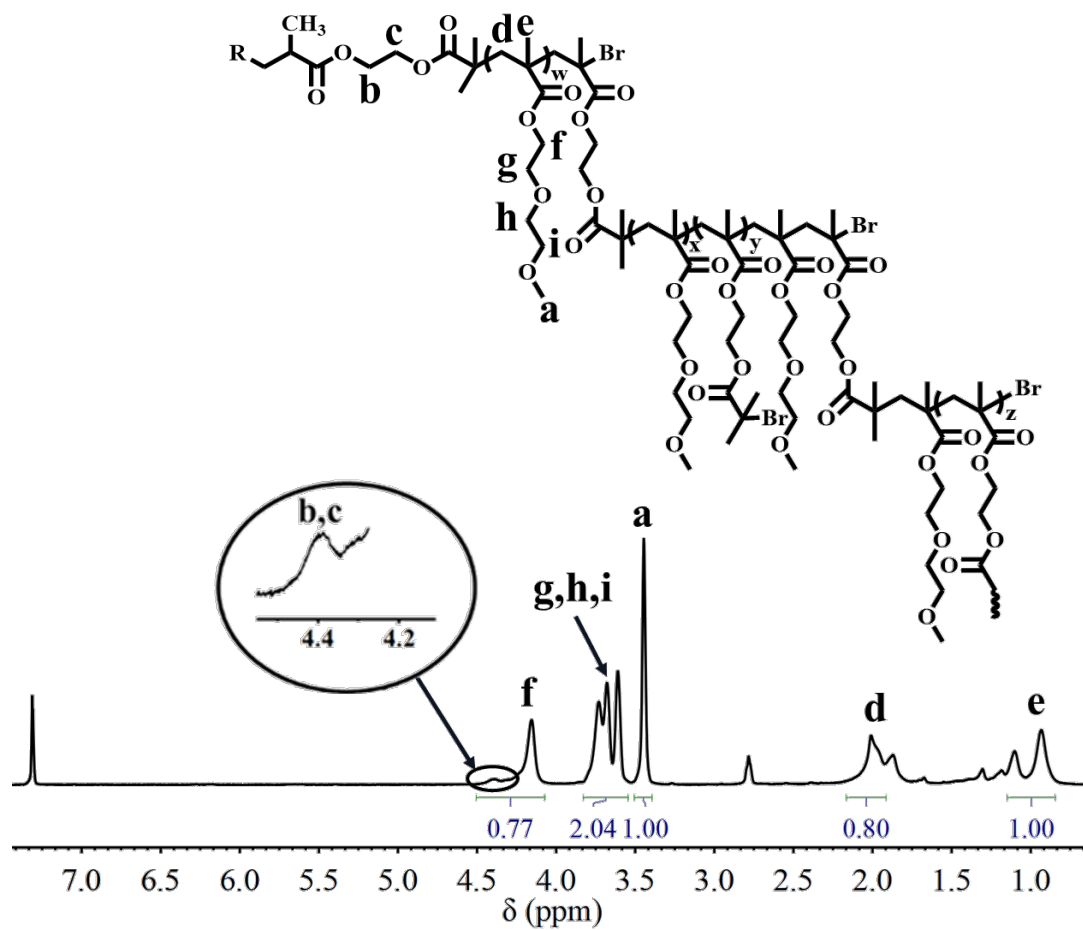

Figure S7.  $^1\text{H}$  NMR spectrum of  $\text{h}_2\text{PDEGMA}$  in  $\text{CDCl}_3$ .

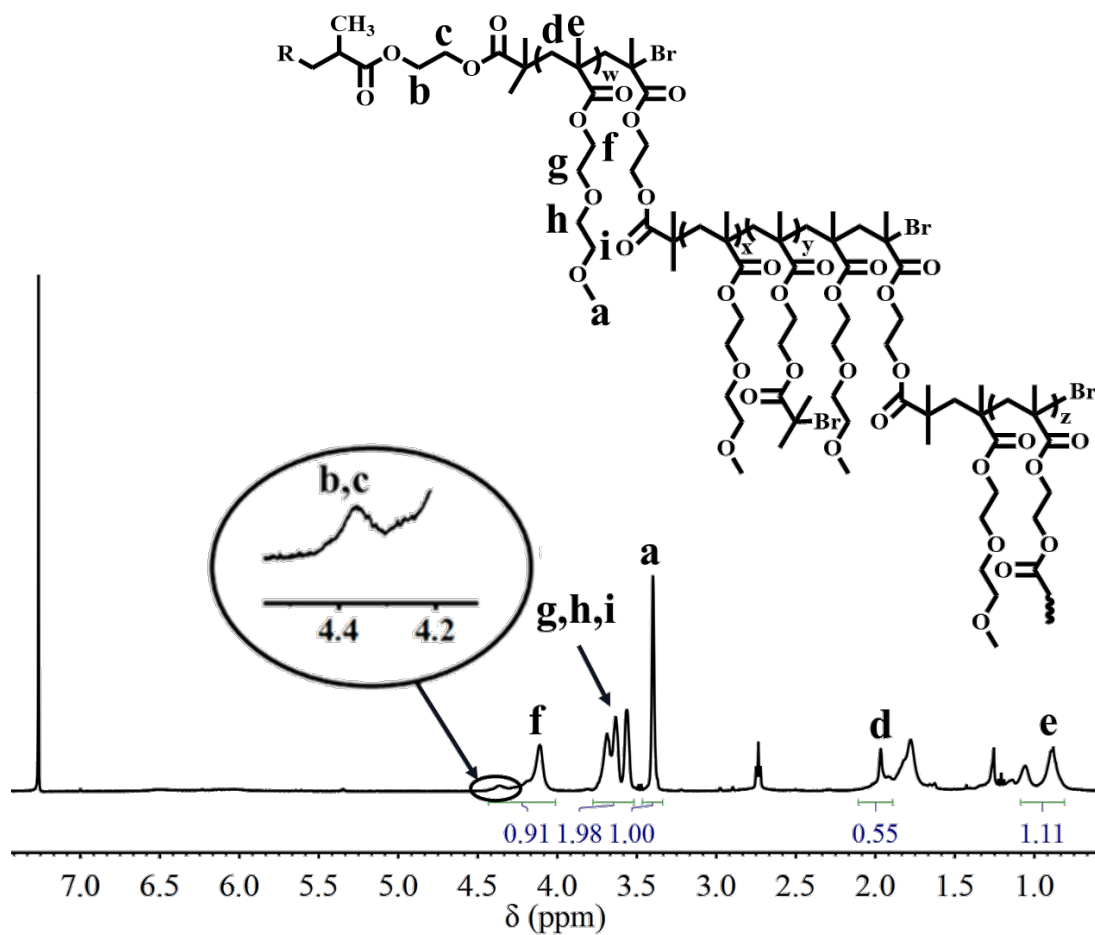

Figure S8.  $^1\text{H}$  NMR spectrum of  $\text{h}_3\text{PDEGMA}$  in  $\text{CDCl}_3$ .

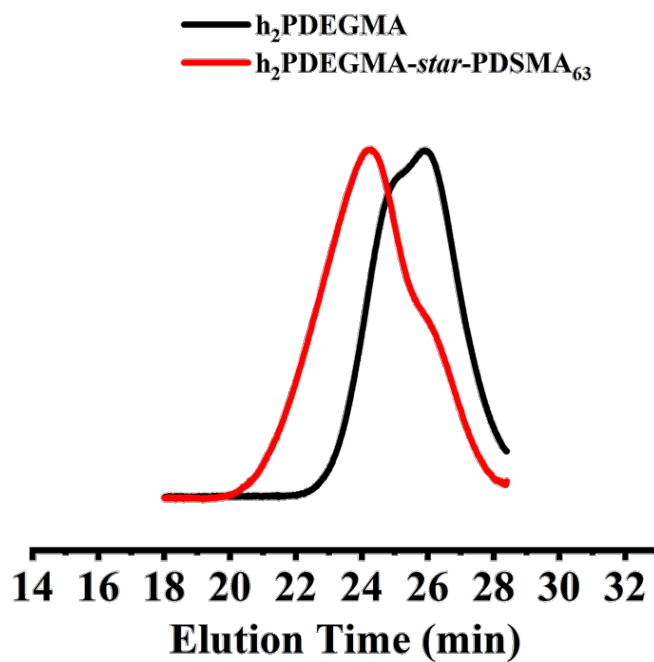

Figure S9. GPC curves of  $\text{h}_2\text{PDEGMA}$  (black line) and  $\text{h}_2\text{PDEGMA-star-PDSMA}_{63}$  (red line).

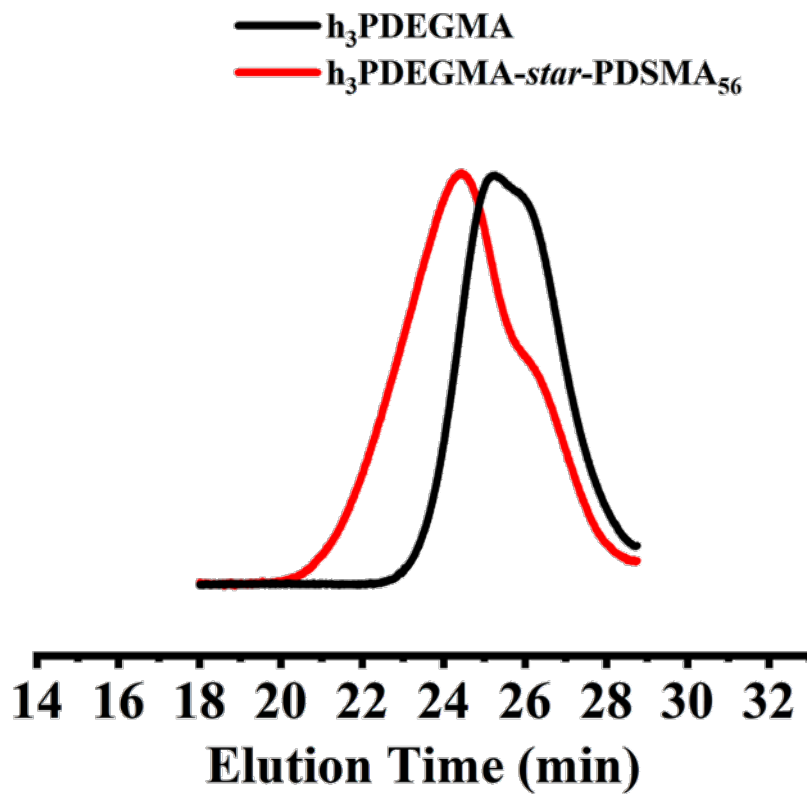

Figure S10. GPC curves of h<sub>3</sub>PDEGMA (black line) and h<sub>3</sub>PDEGMA-*star*-PDSMA<sub>56</sub> (red line).

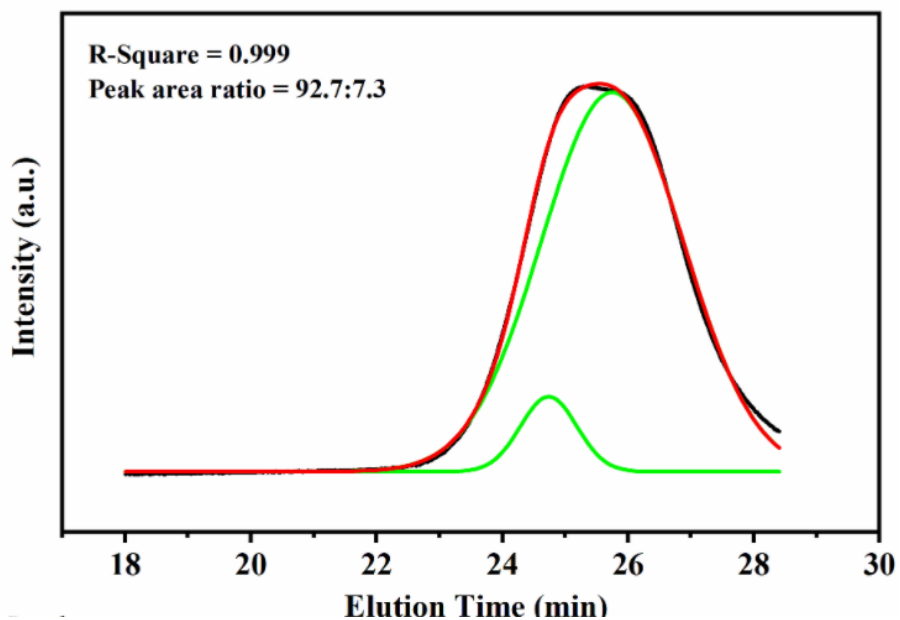

Figure S11. Fitting result of the GPC curve of h<sub>1</sub>PDEGMA. The  $M_n$ s of the two peaks are 12.8 and 23.7 kDa.

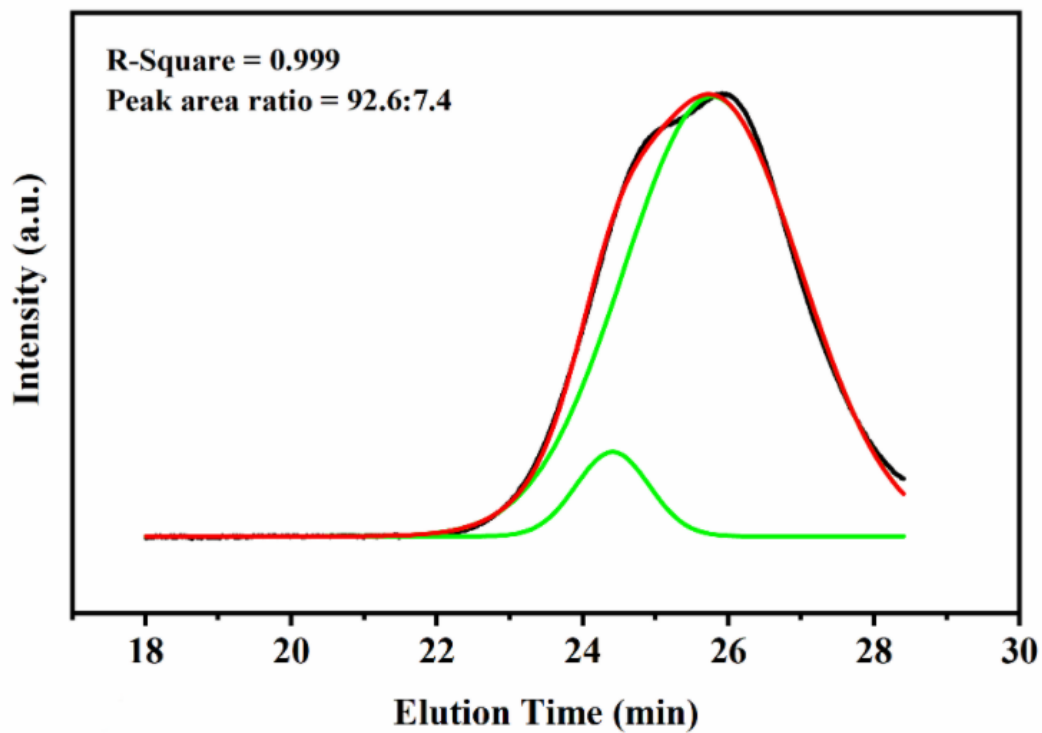

Figure S12. Fitting result of the GPC curve of h<sub>2</sub>PDEGMA. The  $M_n$ s of the two peaks are 12.6 and 28.8 kDa.

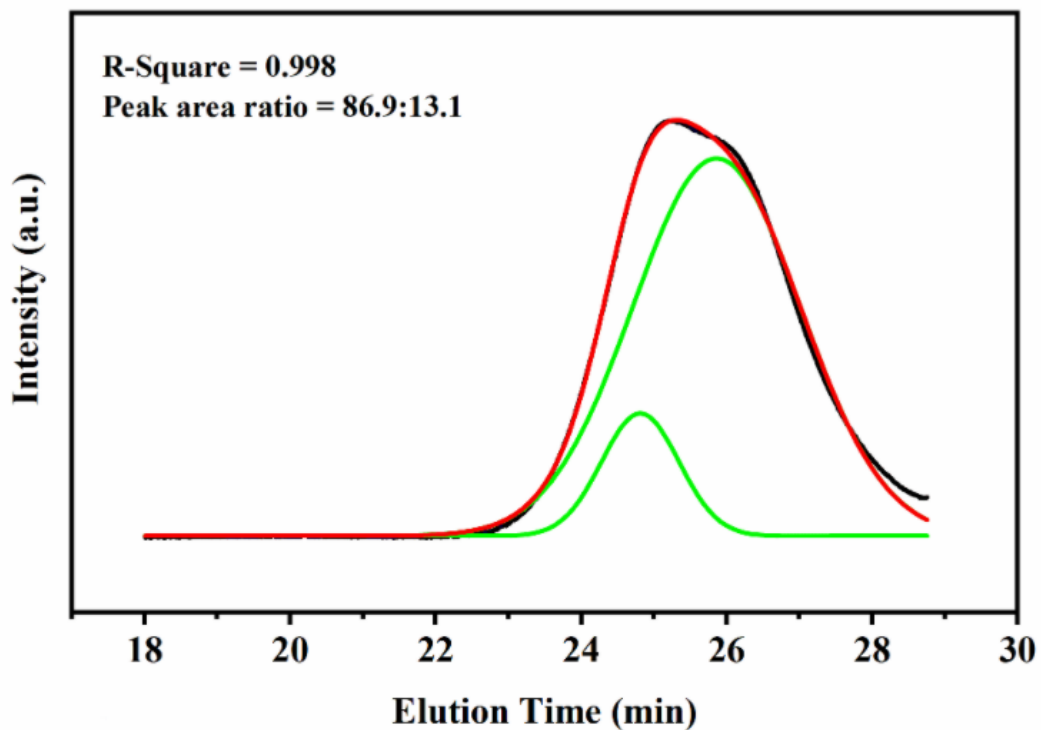

Figure S13. Fitting result of the GPC curve of h<sub>3</sub>PDEGMA. The  $M_n$ s of the two peaks are 12.0 and 22.6 kDa.



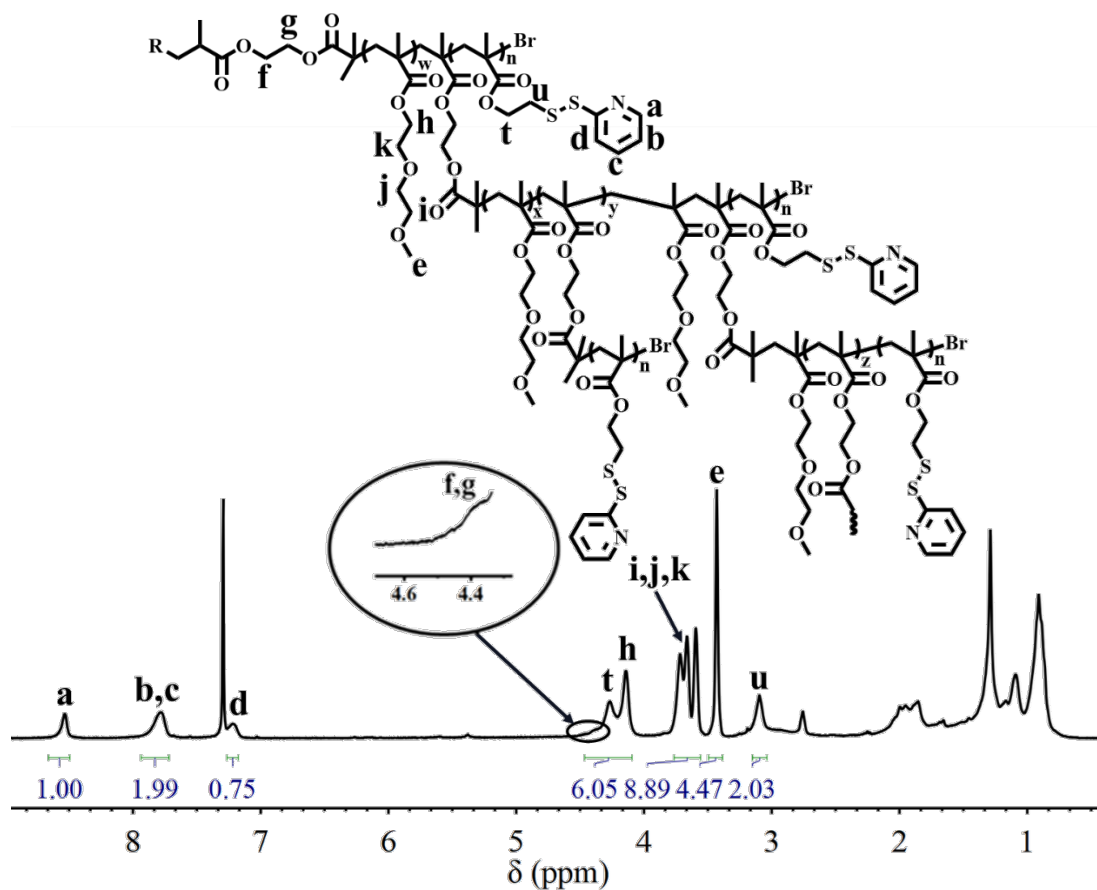

Figure S14. <sup>1</sup>H NMR spectrum of h<sub>1</sub>PDEGMA-*star*-PDSMA<sub>56</sub> in CDCl<sub>3</sub>.

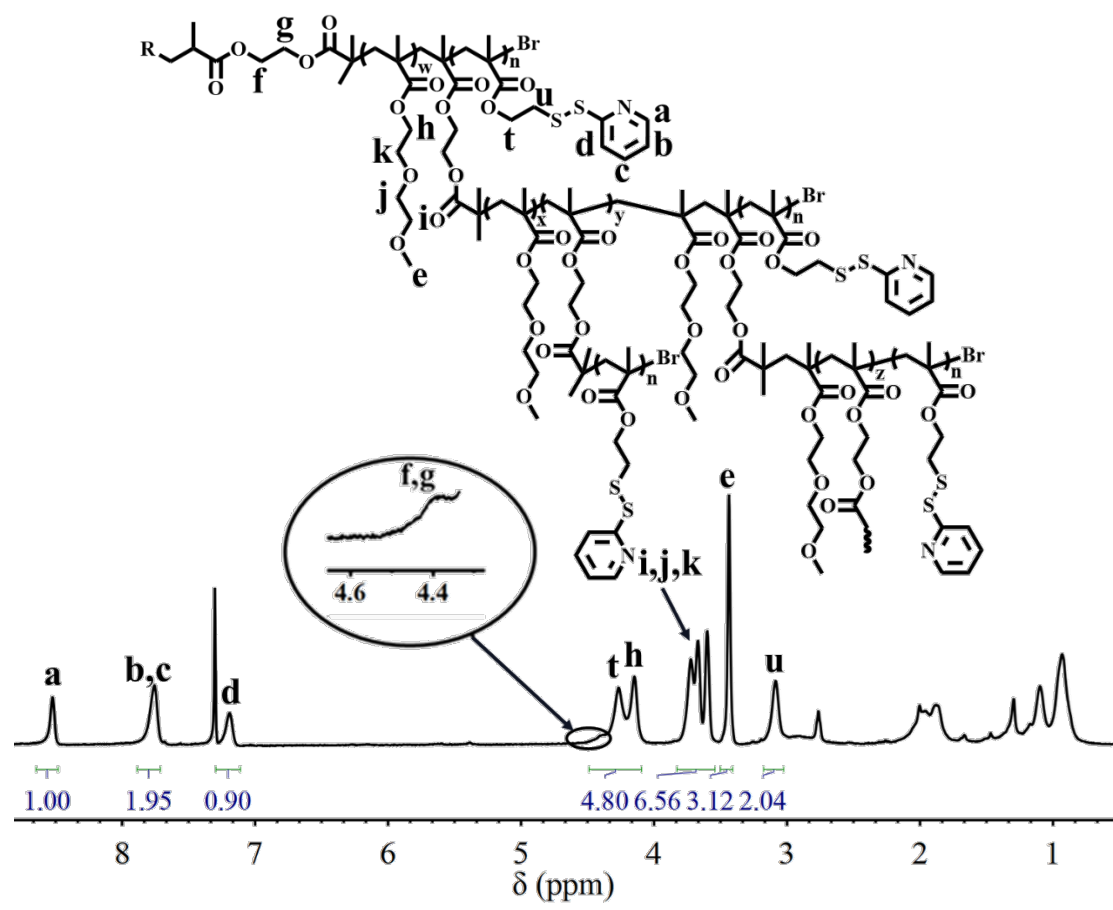

Figure S15. <sup>1</sup>H NMR spectrum of h<sub>2</sub>PDEGMA-star-PDSMA<sub>63</sub> in CDCl<sub>3</sub>.

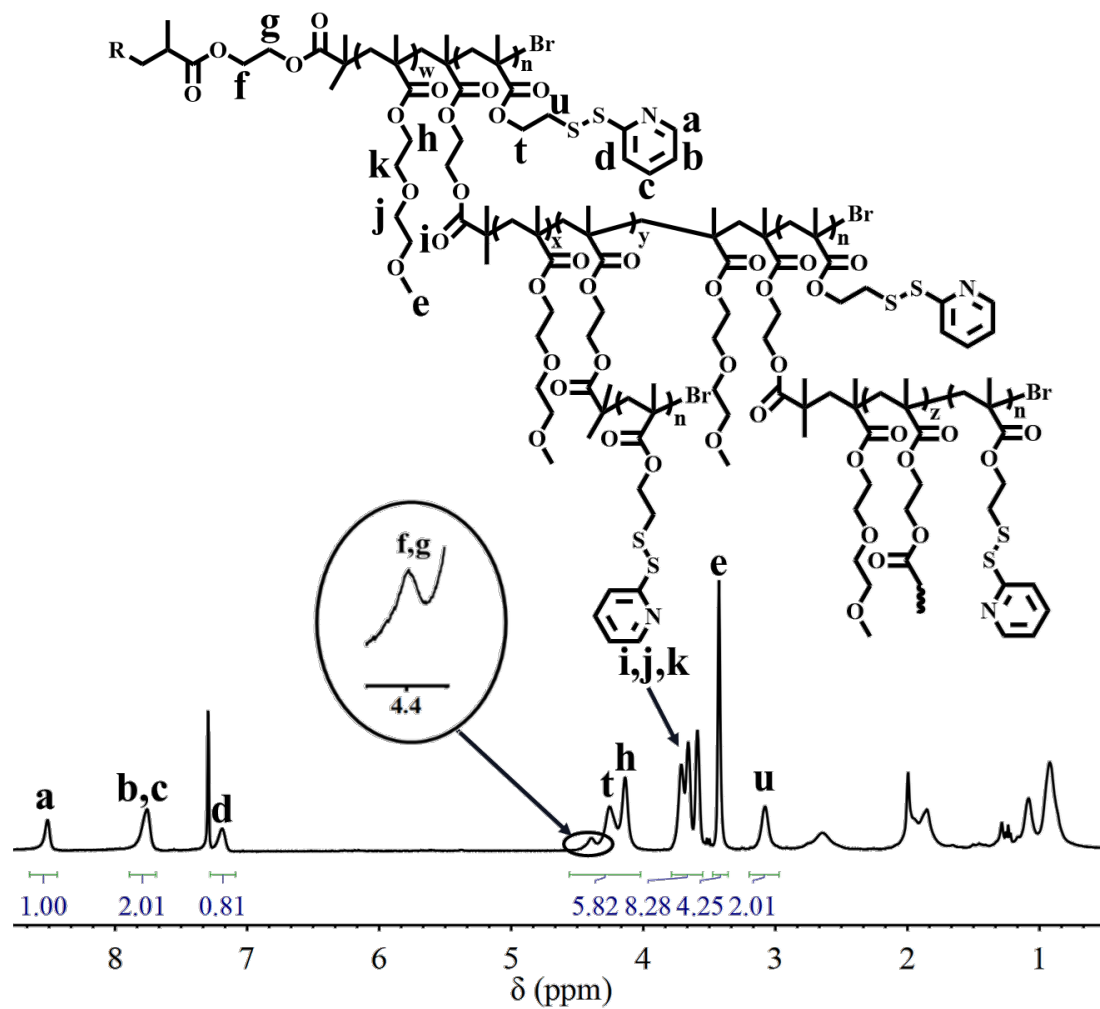

Figure S16.  $^1\text{H}$  NMR spectrum of  $h_3$ PDEGMA-*star*-PDSMA<sub>56</sub> in  $\text{CDCl}_3$ .

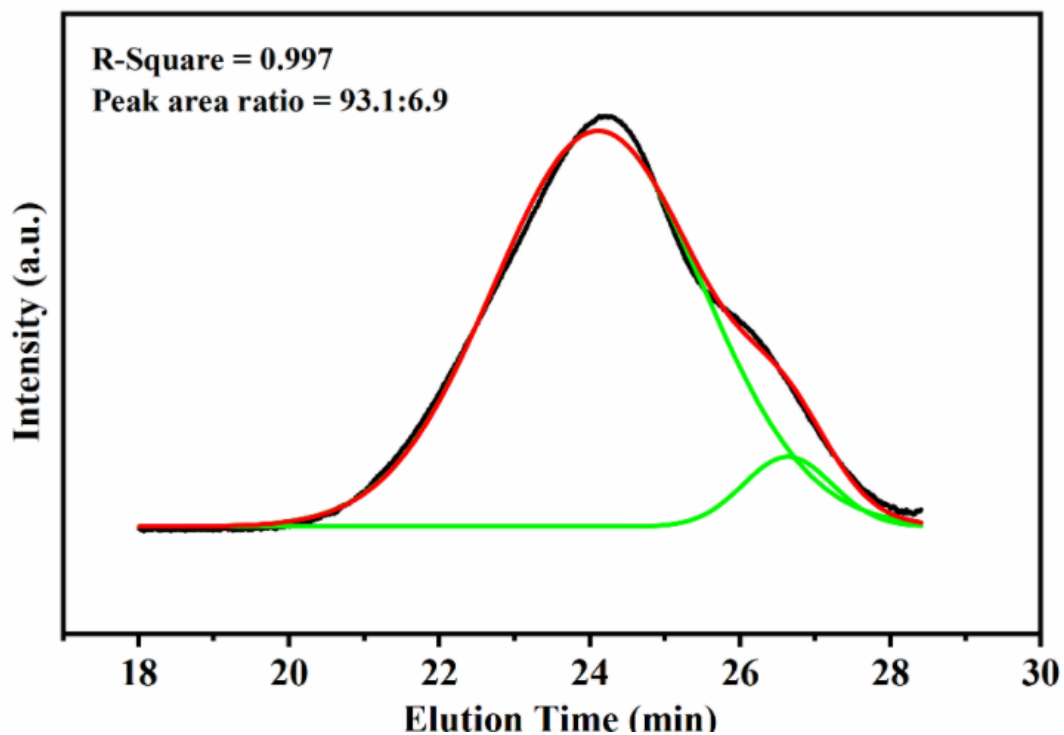

Figure S17. Fitting result of the GPC curve of  $h_1$ PDEGMA-*star*-PDSMA<sub>56</sub>. The  $M_n$ s of the two peaks are 7.5 and 34.5 kDa.

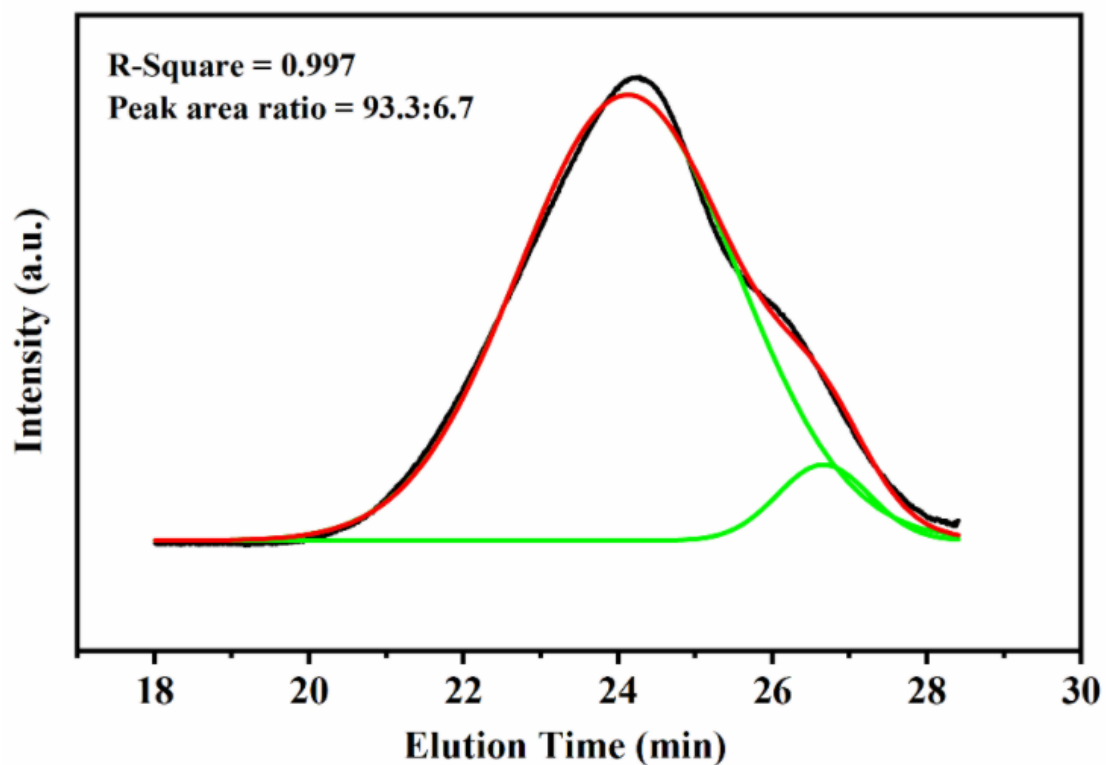

Figure S18. Fitting result of the GPC curve of  $h_2$ PDEGMA-*star*-PDSMA<sub>63</sub>. The  $M_n$ s of the two peaks are 7.4 and 34.2 kDa.

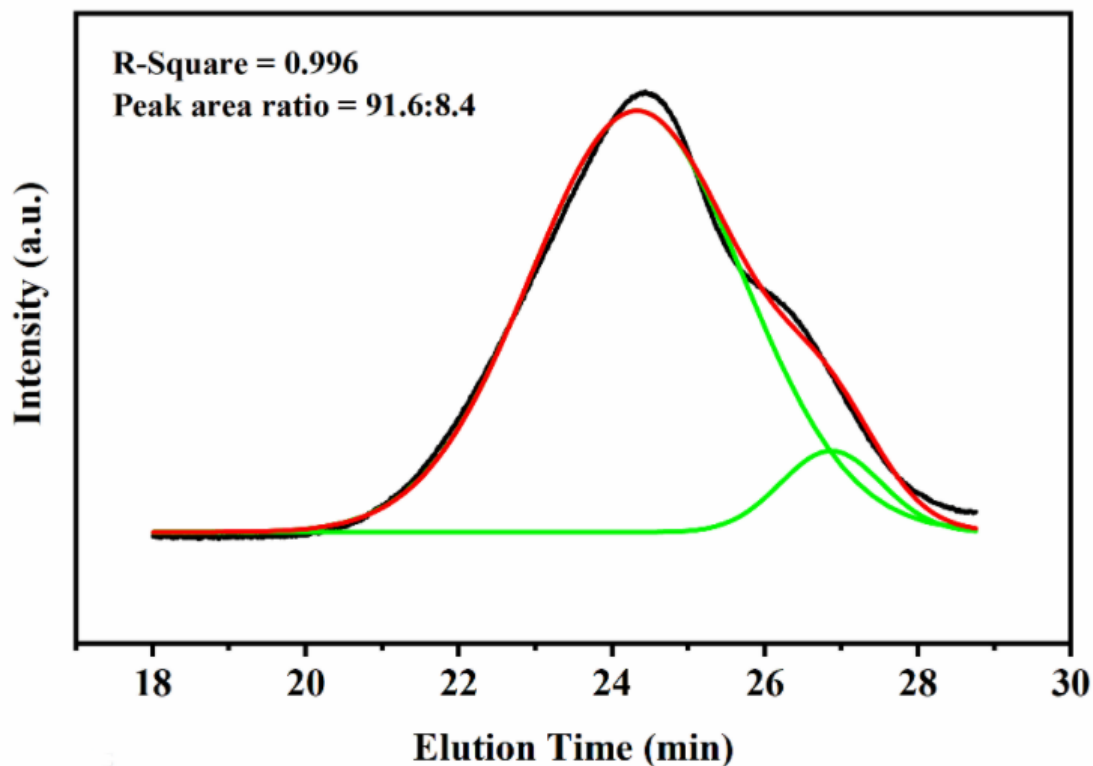

Figure S19. Fitting result of the GPC curve of  $h_3$ PDEGMA-*star*-PDSMA<sub>56</sub>. The  $M_n$ s of the two peaks are 6.5 and 30.4 kDa.

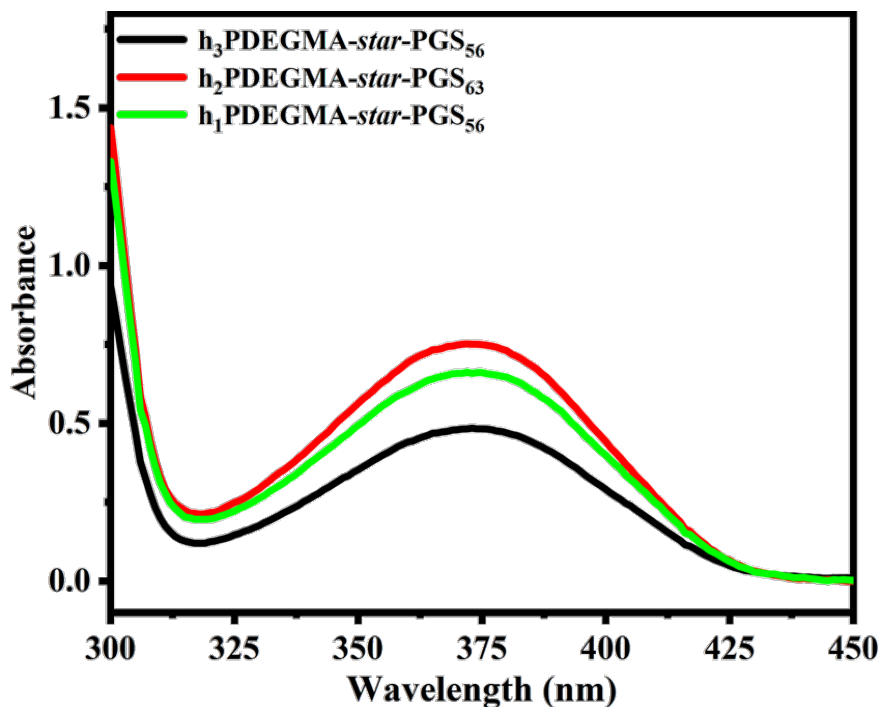

Figure S20. UV-vis absorbance spectra of 2-mercaptopyridine in water as a byproduct of  $h_1$ PDEGMA-*star*-PGS<sub>56</sub> (green line),  $h_2$ PDEGMA-*star*-PGS<sub>63</sub> (red line), and  $h_3$ PDEGMA-*star*-PGS<sub>56</sub> (black line).

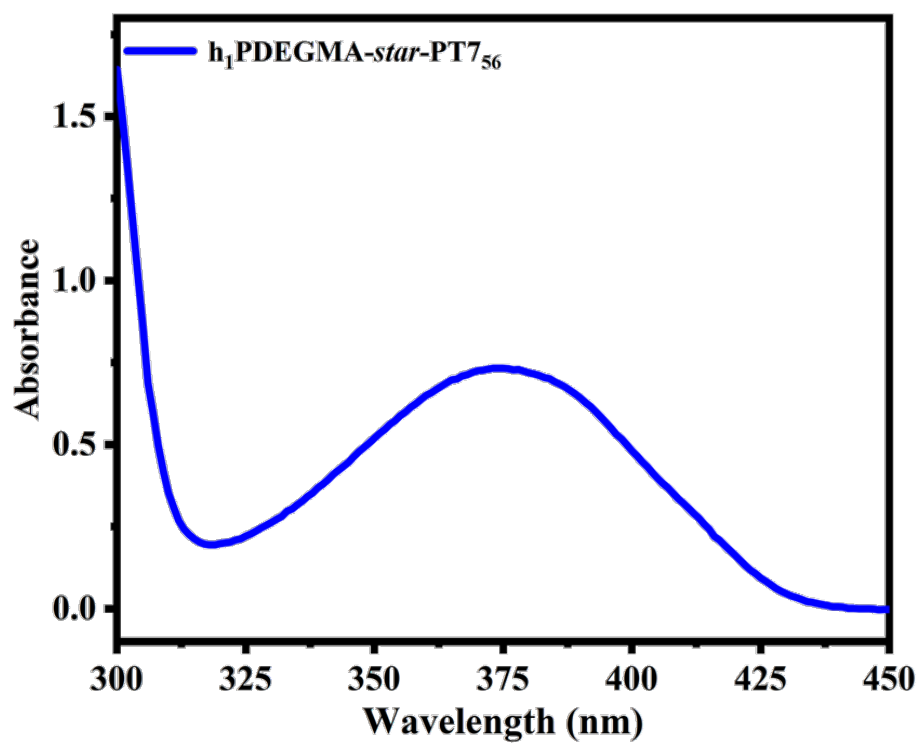

Figure S21. UV-vis absorbance spectrum of 2-mercaptopyridine in water as a byproduct of  $h_1$ PDEGMA-*star*-PT7<sub>56</sub>.
